# Supplementary material for: Global and national trends in the age‐specific sex ratio of esophageal cancer and gastric cancer by subtype
Source: PubMed Central journal article supplement — Int J Cancer. 2022 Jun 22;151(9):1447–61. doi: 10.1002/ijc.34158 (PMC9541383; doi:10.1002/ijc.34158), 2022-06-22
Supplement: IJC-151-1447-s001.pdf [file IJC-151-1447-s001.pdf]

**Global and national trends in the age-specific sex ratio of esophageal cancer and gastric cancer by subtype**

Shaoming Wang, Rongshou Zheng, Melina Arnold, Christian Abnet, Hongmei Zeng, Siwei Zhang, Ru Chen, Kexin Sun, Li Li, Lan An, Freddie Bray, Wenqiang Wei, Jie He

**Table of Contents**

|                              |    |
|------------------------------|----|
| Supplementary Table 1 .....  | 1  |
| Supplementary Table 2 .....  | 8  |
| Supplementary Table 3 .....  | 14 |
| Supplementary Figure 1 ..... | 20 |

**Supplementary Table 1. Cancer registries included in the analyses of esophageal cancer (EC) and gastric cancer (GC) in this study**

| No. | World region     | Country           | Cancer Registry               | Population of<br>2003-2012 | EC cases of<br>2003-2012 | GC case of<br>2003-2012 | EC<br>analysis | GC<br>analysis |
|-----|------------------|-------------------|-------------------------------|----------------------------|--------------------------|-------------------------|----------------|----------------|
| 1   | Northern America | Canada            | Canada, Northwest Territories | 432876                     | 10                       | 30                      | NO             | NO             |
| 2   | Northern America | Canada            | Canada, Alberta               | 35357377                   | 1490                     | 2497                    | YES            | YES            |
| 3   | Northern America | Canada            | Canada, Yukon                 | 332192                     | 14                       | 33                      | NO             | YES            |
| 4   | Northern America | Canada            | Canada, Saskatchewan          | 10297273                   | 457                      | 900                     | YES            | YES            |
| 5   | Northern America | Canada            | Canada, Prince Edward Island  | 1398500                    | 87                       | 116                     | YES            | YES            |
| 6   | Northern America | Canada            | Canada, Ontario               | 128312256                  | 6428                     | 11308                   | YES            | YES            |
| 7   | Northern America | Canada            | Canada, Nova Scotia           | 9394156                    | 640                      | 932                     | YES            | YES            |
| 8   | Northern America | Canada            | Canada, New Brunswick         | 7500067                    | 444                      | 806                     | YES            | YES            |
| 9   | Northern America | Canada            | Canada, Manitoba              | 12088364                   | 528                      | 1196                    | YES            | YES            |
| 10  | Northern America | Canada            | Canada, British Columbia      | 43295298                   | 2424                     | 3636                    | YES            | YES            |
| 11  | Northern America | USA               | USA, NPCR                     | 2786191538                 | 144720                   | 196340                  | YES            | YES            |
| 12  | Eastern Asia     | Republic of Korea | Korea                         | 492892221                  | 21307                    | 278911                  | YES            | YES            |
| 13  | Eastern Asia     | China             | China, Shanghai               | 61833233                   | 5607                     | 25604                   | YES            | YES            |
| 14  | Eastern Asia     | China             | China, Jiashan                | 3819782                    | 617                      | 1451                    | NO             | YES            |
| 15  | Eastern Asia     | China             | China, Zhongshan              | 10130997                   | 1156                     | 903                     | YES            | YES            |
| 16  | Eastern Asia     | China             | China, Jiaxing City           | 4059016                    | 500                      | 1081                    | NO             | YES            |
| 17  | Eastern Asia     | China             | China, Beijing                | 74496578                   | 6572                     | 14610                   | YES            | YES            |
| 18  | Eastern Asia     | China             | China, Cixian                 | 6234346                    | 6736                     | 3572                    | YES            | YES            |
| 19  | Eastern Asia     | China             | China, Yanting County         | 6028162                    | 5649                     | 6934                    | YES            | YES            |
| 20  | Eastern Asia     | China             | China, Hong Kong              | 69281900                   | 4393                     | 10526                   | YES            | YES            |
| 21  | Eastern Asia     | China             | China, Wuhan                  | 47230943                   | 4301                     | 11325                   | NO             | YES            |
| 22  | Eastern Asia     | China             | China, Qidong County          | 11261461                   | 1411                     | 4470                    | YES            | YES            |
| 23  | Eastern Asia     | Japan             | Japan, Niigata Prefecture     | 24010863                   | 5355                     | 33169                   | YES            | YES            |

|    |                    |             |                             |           |       |       |     |     |
|----|--------------------|-------------|-----------------------------|-----------|-------|-------|-----|-----|
| 24 | Eastern Asia       | Japan       | Japan, Aichi Prefecture     | 44029505  | 5109  | 32645 | YES | YES |
| 25 | Eastern Asia       | Japan       | Japan, Osaka Prefecture     | 88626813  | 13691 | 72490 | YES | YES |
| 26 | Eastern Asia       | Japan       | Japan, Miyagi Prefecture    | 18847279  | 3541  | 19391 | YES | YES |
| 27 | Eastern Asia       | Japan       | Japan, Nagasaki             | 14517179  | 2049  | 14474 | YES | YES |
| 28 | Eastern Asia       | Japan       | Japan, Fukui Prefecture     | 8132464   | 927   | 9212  | YES | YES |
| 29 | Eastern Africa     | Uganda      | Uganda, Kyadondo County     | 20551333  | 733   | 289   | YES | NO  |
| 30 | Eastern Africa     | Zimbabwe    | Zimbabwe, Harare: African   | 10087147  | 501   | 456   | YES | NO  |
| 31 | Northern Africa    | Algeria     | Algeria, Setif Wilaya       | 13314815  | 52    | 417   | YES | NO  |
| 32 | Central America    | Costa Rica  | Costa Rica                  | 39454769  | 464   | 6929  | YES | NO  |
| 33 | South-Eastern Asia | Malaysia    | Malaysia, Penang            | 9935600   | 153   | 572   | YES | NO  |
| 34 | South-Eastern Asia | Philippines | Philippines, Rizal          | 69983224  | 512   | 1707  | YES | NO  |
| 35 | South-Eastern Asia | Philippines | Philippines, Manila         | 62088322  | 550   | 1762  | YES | NO  |
| 36 | South-Eastern Asia | Thailand    | Thailand, Khon Kaen         | 17423242  | 130   | 491   | YES | NO  |
| 37 | South-Eastern Asia | Thailand    | Thailand, Lampang           | 7625533   | 122   | 452   | YES | NO  |
| 38 | South-Eastern Asia | Thailand    | Thailand, Chonburi          | 10834447  | 359   | 423   | YES | NO  |
| 39 | South-Eastern Asia | Thailand    | Thailand, Bangkok           | 54730668  | 1206  | 2011  | YES | NO  |
| 40 | South-Eastern Asia | Thailand    | Thailand, Songkhla          | 12609989  | 651   | 266   | YES | YES |
| 41 | South-Eastern Asia | Thailand    | Thailand, Chiang Mai        | 15236978  | 208   | 995   | YES | YES |
| 42 | South-Central Asia | India       | India, Poona                | 43050250  | 1196  | 802   | YES | NO  |
| 43 | South-Central Asia | India       | India, Dindigul, Ambalikkai | 20832753  | 573   | 875   | YES | NO  |
| 44 | South-Central Asia | India       | India, Bhopal               | 16071686  | 591   | 215   | YES | NO  |
| 45 | South-Central Asia | India       | India, Bangalore            | 59878849  | 2886  | 3142  | YES | NO  |
| 46 | South-Central Asia | India       | India, Trivandrum           | 9325471   | 262   | 355   | YES | YES |
| 47 | South-Central Asia | India       | India, Sikkim State         | 5873404   | 308   | 448   | YES | YES |
| 48 | South-Central Asia | India       | India, Mumbai (Bombay)      | 131901298 | 3988  | 3564  | YES | YES |
| 49 | South-Central Asia | India       | India, Mizoram              | 10269714  | 1057  | 2303  | YES | YES |

|    |                 |                |                             |           |       |        |     |     |
|----|-----------------|----------------|-----------------------------|-----------|-------|--------|-----|-----|
| 50 | Western Asia    | Bahrain        | Bahrain: Bahraini           | 5145975   | 57    | 142    | YES | NO  |
| 51 | Western Asia    | Kuwait         | Kuwait: Non-Kuwaitis        | 21921772  | 48    | 197    | NO  | NO  |
| 52 | Western Asia    | Kuwait         | Kuwait: Kuwaitis            | 10542668  | 61    | 158    | YES | NO  |
| 53 | Western Asia    | Qatar          | Qatar: Qatari               | 2251866   | 34    | 66     | YES | NO  |
| 54 | Western Asia    | Saudi Arabia   | Saudi Arabia, Riyadh: Saudi | 40477665  | 260   | 690    | YES | YES |
| 55 | Western Asia    | Turkey         | Turkey, Trabzon             | 5982505   | 83    | 1318   | YES | YES |
| 56 | Western Asia    | Turkey         | Turkey, Izmir               | 37712377  | 844   | 4380   | YES | YES |
| 57 | Western Asia    | Turkey         | Turkey, Antalya             | 17947694  | 204   | 1455   | YES | YES |
| 58 | Western Asia    | Turkey         | Turkey, Edirne              | 3514859   | 54    | 578    | NO  | YES |
| 59 | Western Asia    | Cyprus         | Cyprus                      | 7997619   | 95    | 743    | YES | YES |
| 60 | Western Asia    | Israel         | Israel                      | 71278142  | 1271  | 7156   | YES | YES |
| 61 | Eastern Europe  | Poland         | Poland, Kielce              | 12873140  | 415   | 2158   | YES | NO  |
| 62 | Eastern Europe  | Belarus        | Belarus                     | 96371318  | 4418  | 33095  | YES | YES |
| 63 | Eastern Europe  | Czech Republic | Czech Republic              | 103676390 | 5434  | 16488  | YES | YES |
| 64 | Eastern Europe  | Poland         | Poland, Lower Silesia       | 28931268  | 1115  | 4530   | YES | YES |
| 65 | Eastern Europe  | Poland         | Poland, Podkarpackie        | 21134879  | 572   | 3410   | YES | YES |
| 66 | Eastern Europe  | Slovakia       | Slovakia                    | 43194129  | 2307  | 7684   | YES | YES |
| 67 | Eastern Europe  | Bulgaria       | Bulgaria                    | 76100441  | 2043  | 17089  | YES | YES |
| 68 | Eastern Europe  | Ukraine        | Ukraine                     | 464534386 | 18580 | 124025 | YES | YES |
| 69 | Northern Europe | Iceland        | Iceland                     | 3089813   | 188   | 315    | YES | YES |
| 70 | Northern Europe | Ireland        | Ireland                     | 43471395  | 3642  | 5043   | YES | YES |
| 71 | Northern Europe | Lithuania      | Lithuania                   | 32548117  | 1847  | 9577   | YES | YES |
| 72 | Northern Europe | Norway         | Norway                      | 47607222  | 2124  | 5166   | YES | YES |
| 73 | Northern Europe | Denmark        | Denmark                     | 54806432  | 4412  | 5463   | YES | YES |
| 74 | Northern Europe | Estonia        | Estonia                     | 13385939  | 639   | 3982   | YES | YES |
| 75 | Northern Europe | Latvia         | Latvia                      | 15287825  | 883   | 4393   | YES | YES |

|     |                 |          |                      |           |       |       |     |     |
|-----|-----------------|----------|----------------------|-----------|-------|-------|-----|-----|
| 76  | Northern Europe | UK       | UK, Scotland         | 51802252  | 8467  | 7698  | YES | YES |
| 77  | Northern Europe | UK       | UK, Northern Ireland | 17653419  | 1793  | 2256  | YES | YES |
| 78  | Northern Europe | UK       | UK, England          | 515565534 | 66928 | 63021 | YES | YES |
| 79  | Northern Europe | UK       | UK, Wales            | 30047438  | 4424  | 4850  | NO  | YES |
| 80  | Southern Europe | Croatia  | Croatia              | 43971124  | 2200  | 10503 | YES | NO  |
| 81  | Southern Europe | Malta    | Malta                | 4097721   | 157   | 503   | YES | YES |
| 82  | Southern Europe | Portugal | Portugal, Azores     | 2198016   | 93    | 471   | NO  | YES |
| 83  | Southern Europe | Italy    | Italy, Veneto        | 16828064  | 1143  | 3504  | YES | YES |
| 84  | Southern Europe | Italy    | Italy, Varese        | 8513690   | 397   | 2251  | YES | YES |
| 85  | Southern Europe | Italy    | Italy, Umbria        | 7837845   | 202   | 3167  | YES | YES |
| 86  | Southern Europe | Italy    | Italy, Turin         | 15734391  | 707   | 3300  | YES | YES |
| 87  | Southern Europe | Italy    | Italy, Trento        | 3539896   | 263   | 828   | YES | YES |
| 88  | Southern Europe | Italy    | Italy, Syracuse      | 3987201   | 60    | 557   | NO  | YES |
| 89  | Southern Europe | Italy    | Italy, South Tyrol   | 3426770   | 187   | 910   | YES | YES |
| 90  | Southern Europe | Italy    | Italy, Sondrio       | 1805312   | 122   | 562   | YES | YES |
| 91  | Southern Europe | Italy    | Italy, Sassari       | 4284251   | 200   | 598   | YES | YES |
| 92  | Southern Europe | Italy    | Italy, Romagna       | 11908509  | 305   | 4946  | YES | YES |
| 93  | Southern Europe | Italy    | Italy, Reggio Emilia | 5115530   | 161   | 1443  | YES | YES |
| 94  | Southern Europe | Italy    | Italy, Parma         | 4211150   | 200   | 1640  | YES | YES |
| 95  | Southern Europe | Italy    | Italy, Palermo       | 11185441  | 191   | 1540  | YES | YES |
| 96  | Southern Europe | Italy    | Italy, Nuoro         | 2321964   | 112   | 466   | YES | YES |
| 97  | Southern Europe | Italy    | Italy, Naples        | 5600592   | 100   | 869   | YES | YES |
| 98  | Southern Europe | Italy    | Italy, Modena        | 6718061   | 191   | 1822  | YES | YES |
| 99  | Southern Europe | Italy    | Italy, Milan         | 18890887  | 806   | 4741  | YES | YES |
| 100 | Southern Europe | Italy    | Italy, Mantua        | 2366393   | 114   | 737   | YES | YES |
| 101 | Southern Europe | Italy    | Italy, Lecco         | 2610265   | 88    | 892   | YES | YES |

|     |                 |             |                                |          |      |       |     |     |
|-----|-----------------|-------------|--------------------------------|----------|------|-------|-----|-----|
| 102 | Southern Europe | Italy       | Italy, Latina                  | 5362948  | 132  | 1093  | YES | YES |
| 103 | Southern Europe | Italy       | Italy, Friuli-Venezia Giulia   | 9772461  | 778  | 3142  | YES | YES |
| 104 | Southern Europe | Italy       | Italy, Ferrara                 | 3194560  | 164  | 905   | YES | YES |
| 105 | Southern Europe | Italy       | Italy, Como                    | 5132892  | 179  | 1481  | YES | YES |
| 106 | Southern Europe | Italy       | Italy, Biella                  | 1861740  | 114  | 446   | YES | YES |
| 107 | Southern Europe | Slovenia    | Slovenia                       | 20245796 | 878  | 4749  | YES | YES |
| 108 | Southern Europe | Spain       | Spain, Tarragona               | 7468595  | 312  | 1000  | YES | YES |
| 109 | Southern Europe | Spain       | Spain, Navarra                 | 4852045  | 251  | 1020  | YES | YES |
| 110 | Southern Europe | Spain       | Spain, Murcia                  | 11097184 | 334  | 1453  | YES | YES |
| 111 | Southern Europe | Spain       | Spain, Mallorca                | 7310124  | 308  | 824   | YES | YES |
| 112 | Southern Europe | Spain       | Spain, La Rioja                | 3096109  | 145  | 673   | YES | YES |
| 113 | Southern Europe | Spain       | Spain, Granada                 | 8893637  | 260  | 1212  | YES | YES |
| 114 | Southern Europe | Spain       | Spain, Girona                  | 6953063  | 376  | 1180  | YES | YES |
| 115 | Southern Europe | Spain       | Spain, Cuenca                  | 1897450  | 78   | 482   | NO  | YES |
| 116 | Southern Europe | Spain       | Spain, Ciudad Real             | 4089799  | 136  | 870   | YES | YES |
| 117 | Southern Europe | Spain       | Spain, Canary Islands          | 13519713 | 682  | 1312  | YES | YES |
| 118 | Southern Europe | Spain       | Spain, Basque Country          | 21449176 | 1585 | 5134  | YES | YES |
| 119 | Southern Europe | Spain       | Spain, Asturias                | 8550899  | 599  | 2003  | YES | YES |
| 120 | Southern Europe | Spain       | Spain, Albacete                | 3096393  | 123  | 513   | YES | YES |
| 121 | Western Europe  | Belgium     | Belgium                        | 96185254 | 8334 | 12796 | YES | YES |
| 122 | Western Europe  | Switzerland | Switzerland, Ticino            | 3293757  | 251  | 604   | YES | YES |
| 123 | Western Europe  | Switzerland | Switzerland, Neuchatel         | 1700447  | 133  | 169   | YES | YES |
| 124 | Western Europe  | Switzerland | Switzerland, Graubunden        | 2283524  | 152  | 321   | YES | YES |
| 125 | Western Europe  | Switzerland | Switzerland, Geneva            | 4411333  | 312  | 426   | YES | YES |
| 126 | Western Europe  | Switzerland | Switzerland, St Gall-Appenzell | 5364741  | 330  | 555   | YES | YES |
| 127 | Western Europe  | Switzerland | Switzerland, Valais            | 3011443  | 239  | 409   | YES | YES |

|     |                       |                 |                               |           |       |       |     |     |
|-----|-----------------------|-----------------|-------------------------------|-----------|-------|-------|-----|-----|
| 128 | Western Europe        | Switzerland     | Switzerland, Vaud             | 6786648   | 608   | 623   | YES | YES |
| 129 | Western Europe        | Switzerland     | Switzerland, Zurich           | 13145648  | 847   | 1308  | YES | YES |
| 130 | Western Europe        | Austria         | Austria                       | 82920804  | 3938  | 14082 | YES | YES |
| 131 | Western Europe        | France          | France, Somme                 | 5657171   | 668   | 650   | YES | YES |
| 132 | Western Europe        | France          | France, Martinique            | 3951952   | 155   | 782   | YES | YES |
| 133 | Western Europe        | France          | France, Manche                | 4441185   | 527   | 803   | YES | YES |
| 134 | Western Europe        | France          | France, Loire-Atlantique      | 12530039  | 1211  | 1264  | YES | YES |
| 135 | Western Europe        | France          | France, Isere                 | 11927935  | 661   | 1255  | YES | YES |
| 136 | Western Europe        | France          | France, Herault               | 10184326  | 637   | 1068  | YES | YES |
| 137 | Western Europe        | France          | France, Haut-Rhin             | 7449913   | 562   | 894   | YES | YES |
| 138 | Western Europe        | France          | France, Doubs                 | 5219638   | 291   | 538   | YES | YES |
| 139 | Western Europe        | France          | France, Calvados              | 6763302   | 716   | 731   | YES | YES |
| 140 | Western Europe        | France          | France, Bas-Rhin              | 9793749   | 749   | 1049  | YES | YES |
| 141 | Western Europe        | France          | France, Vendee                | 6129114   | 582   | 744   | YES | YES |
| 142 | Western Europe        | France          | France, Tarn                  | 3715474   | 265   | 429   | YES | YES |
| 143 | Western Europe        | Germany         | Germany, Schleswig-Holstein   | 28255422  | 2465  | 6017  | YES | YES |
| 144 | Western Europe        | Germany         | Germany, Saarland             | 10352384  | 746   | 2114  | YES | YES |
| 145 | Western Europe        | Germany         | Germany, Munich               | 42369816  | 2662  | 7964  | YES | YES |
| 146 | Western Europe        | Germany         | Germany, Hamburg              | 17534050  | 1748  | 3044  | YES | YES |
| 147 | Western Europe        | Germany         | Germany, Bremen               | 6621502   | 652   | 1298  | YES | YES |
| 148 | Western Europe        | The Netherlands | The Netherlands               | 164594104 | 17761 | 20075 | YES | YES |
| 149 | Australia/New Zealand | Australia       | Australia, Queensland         | 41989874  | 2443  | 3391  | YES | YES |
| 150 | Australia/New Zealand | Australia       | Australia, Northern Territory | 2172680   | 98    | 77    | YES | YES |
| 151 | Australia/New Zealand | Australia       | Australia, Tasmania           | 4945490   | 440   | 538   | YES | YES |
| 152 | Australia/New Zealand | Australia       | Australia, Western            | 21607205  | 1266  | 1765  | YES | YES |
| 153 | Australia/New Zealand | Australia       | Australia, New South Wales    | 69524461  | 4202  | 6654  | YES | YES |

|     |                       |             |                              |          |      |      |     |     |
|-----|-----------------------|-------------|------------------------------|----------|------|------|-----|-----|
| 154 | Australia/New Zealand | Australia   | Australia, Victoria          | 52544668 | 3244 | 5471 | YES | YES |
| 155 | Australia/New Zealand | Australia   | Australia, South             | 15898446 | 1082 | 1638 | YES | YES |
| 156 | Australia/New Zealand | New Zealand | New Zealand                  | 42378835 | 2698 | 3742 | YES | YES |
| 157 | South America         | Uruguay     | Uruguay                      | 26921032 | 2154 | 4150 | YES | NO  |
| 158 | South America         | Argentina   | Argentina, Cordoba           | 12138354 | 505  | 997  | YES | NO  |
| 159 | South America         | Argentina   | Argentina, Tierra del Fuego  | 1234608  | 26   | 83   | NO  | NO  |
| 160 | South America         | Chile       | Chile, Region of Antofagasta | 4406932  | 134  | 587  | YES | NO  |
| 161 | South America         | Colombia    | Colombia, Pasto              | 3969974  | 62   | 796  | YES | NO  |
| 162 | South America         | Colombia    | Colombia, Manizales          | 3828790  | 103  | 683  | YES | NO  |
| 163 | South America         | Argentina   | Argentina, Mendoza           | 16844458 | 821  | 1811 | YES | YES |
| 164 | South America         | Brazil      | Brazil, Aracaju              | 4788440  | 108  | 368  | YES | YES |
| 165 | South America         | Brazil      | Brazil, Goiania              | 12471354 | 486  | 1386 | YES | YES |
| 166 | South America         | Chile       | Chile, Bio Bio Province      | 3804850  | 295  | 1321 | YES | YES |
| 167 | South America         | Chile       | Chile, Valdivia              | 3758280  | 251  | 1114 | YES | YES |
| 168 | South America         | Colombia    | Colombia, Cali               | 21428447 | 360  | 3681 | YES | YES |
| 169 | South America         | Colombia    | Colombia, Bucaramanga        | 10497931 | 187  | 1531 | YES | YES |
| 170 | South America         | Ecuador     | Ecuador, Quito               | 15708823 | 190  | 2655 | YES | YES |
| 171 | South America         | Ecuador     | Ecuador, Cuenca              | 4800490  | 37   | 810  | NO  | YES |

Note: EC, esophageal cancer; GC, gastric cancer; Case number is the total cases of esophageal cancer or gastric cancer that included in CIS volumes X to XI from 2003 to 2012



**Supplementary Table 2. National estimations of age-standardized incidence rates and 95%CIs for esophageal cancer and gastric cancer in males, overall and by subtype and subsite (2003-2012)**

| World region       | Country           | Period    | Age-standardized incidence rate (95%CIs) |                 |                    |                    |                    |                 |
|--------------------|-------------------|-----------|------------------------------------------|-----------------|--------------------|--------------------|--------------------|-----------------|
|                    |                   |           | Gastric cancer                           | GCC             | GNCC               | Esophageal cancer  | ESCC               | EAC             |
| Total              | Total             | 2003–2012 | 14.89(14.86,14.92)                       | 2.55(2.54,2.57) | 12.34(12.31,12.37) | 6.36(6.34,6.38)    | 3.26(3.24,3.27)    | 2.97(2.96,2.98) |
| Total              | Total             | 2003-2007 | 15.29(15.24,15.34)                       | 2.56(2.54,2.58) | 12.74(12.69,12.78) | 6.46(6.43,6.49)    | 3.41(3.39,3.44)    | 2.91(2.89,2.94) |
| Total              | Total             | 2008–2012 | 14.55(14.50,14.59)                       | 2.55(2.53,2.57) | 12.00(11.96,12.04) | 6.27(6.25,6.30)    | 3.12(3.10,3.14)    | 3.02(3.00,3.04) |
| Northern America   | Canada            | 2003–2012 | 6.74(6.62,6.86)                          | 2.56(2.49,2.63) | 4.18(4.09,4.27)    | 4.73(4.63,4.83)    | 1.35(1.30,1.40)    | 3.25(3.17,3.34) |
| Northern America   | Canada            | 2003-2007 | 7.22(7.04,7.40)                          | 2.62(2.51,2.73) | 4.60(4.46,4.74)    | 4.47(4.33,4.61)    | 1.40(1.32,1.48)    | 2.95(2.84,3.07) |
| Northern America   | Canada            | 2008–2012 | 6.33(6.18,6.49)                          | 2.51(2.41,2.61) | 3.83(3.71,3.95)    | 4.95(4.81,5.09)    | 1.31(1.23,1.38)    | 3.51(3.39,3.62) |
| Northern America   | USA               | 2003–2012 | 5.77(5.74,5.81)                          | 2.23(2.21,2.25) | 3.54(3.51,3.57)    | 5.57(5.54,5.60)    | 1.52(1.51,1.54)    | 3.89(3.87,3.92) |
| Northern America   | USA               | 2003-2007 | 5.92(5.87,5.97)                          | 2.20(2.17,2.23) | 3.72(3.68,3.76)    | 5.76(5.71,5.81)    | 1.66(1.64,1.69)    | 3.95(3.90,3.99) |
| Northern America   | USA               | 2008–2012 | 5.66(5.62,5.71)                          | 2.26(2.23,2.29) | 3.40(3.37,3.44)    | 5.42(5.37,5.46)    | 1.41(1.39,1.43)    | 3.85(3.81,3.89) |
| Eastern Asia       | China             | 2003–2012 | 21.08(20.89,21.27)                       | 3.63(3.56,3.71) | 17.45(17.28,17.62) | 10.76(10.61,10.91) | 9.98(9.84,10.13)   | 0.59(0.56,0.63) |
| Eastern Asia       | China             | 2003-2007 | 22.54(22.25,22.82)                       | 4.00(3.88,4.12) | 18.54(18.28,18.80) | 11.95(11.72,12.18) | 11.17(10.94,11.39) | 0.58(0.53,0.62) |
| Eastern Asia       | China             | 2008–2012 | 19.82(19.57,20.07)                       | 3.33(3.23,3.43) | 16.49(16.26,16.72) | 9.77(9.58,9.97)    | 9.02(8.83,9.20)    | 0.60(0.55,0.64) |
| Eastern Asia       | Japan             | 2003–2012 | 55.06(54.73,55.39)                       | 3.82(3.74,3.91) | 51.24(50.92,51.55) | 12.02(11.86,12.17) | 11.23(11.08,11.38) | 0.55(0.51,0.58) |
| Eastern Asia       | Japan             | 2003-2007 | 54.16(53.66,54.67)                       | 3.48(3.35,3.60) | 50.69(50.20,51.17) | 11.88(11.64,12.12) | 11.16(10.93,11.39) | 0.48(0.43,0.52) |
| Eastern Asia       | Japan             | 2008–2012 | 55.57(55.14,56.00)                       | 4.07(3.95,4.19) | 51.50(51.08,51.92) | 12.10(11.90,12.31) | 11.26(11.07,11.46) | 0.60(0.55,0.65) |
| Eastern Asia       | Republic of Korea | 2003–2012 | 63.84(63.55,64.14)                       | 2.84(2.78,2.91) | 61.00(60.71,61.29) | 6.90(6.80,6.99)    | 6.52(6.42,6.61)    | 0.25(0.23,0.27) |
| Eastern Asia       | Republic of Korea | 2003-2007 | 64.61(64.17,65.06)                       | 2.70(2.61,2.79) | 61.91(61.48,62.35) | 7.41(7.25,7.56)    | 6.97(6.82,7.12)    | 0.29(0.26,0.32) |
| Eastern Asia       | Republic of Korea | 2008–2012 | 63.18(62.79,63.57)                       | 2.95(2.86,3.03) | 60.23(59.85,60.62) | 6.48(6.35,6.61)    | 6.14(6.02,6.27)    | 0.22(0.20,0.24) |
| South-Eastern Asia | Thailand          | 2003–2012 | 4.64(4.30,4.99)                          | 0.49(0.38,0.60) | 4.15(3.82,4.48)    | 3.82(3.66,3.98)    | 3.58(3.42,3.73)    | 0.19(0.16,0.23) |
| South-Eastern Asia | Thailand          | 2003-2007 | 5.02(4.49,5.56)                          | 0.41(0.26,0.57) | 4.61(4.10,5.12)    | 3.86(3.63,4.09)    | 3.58(3.36,3.80)    | 0.21(0.16,0.27) |
| South-Eastern Asia | Thailand          | 2008–2012 | 4.29(3.84,4.74)                          | 0.56(0.40,0.72) | 3.73(3.31,4.15)    | 3.79(3.57,4.01)    | 3.58(3.36,3.79)    | 0.17(0.12,0.21) |
| South-Central Asia | India             | 2003–2012 | 7.36(7.14,7.58)                          | 0.82(0.75,0.90) | 6.54(6.33,6.74)    | 5.96(5.82,6.10)    | 5.52(5.38,5.66)    | 0.40(0.36,0.44) |

|                    |                |           |                    |                 |                    |                 |                 |                 |
|--------------------|----------------|-----------|--------------------|-----------------|--------------------|-----------------|-----------------|-----------------|
| South-Central Asia | India          | 2003-2007 | 7.51(7.18,7.84)    | 0.65(0.56,0.75) | 6.85(6.54,7.17)    | 6.18(5.96,6.41) | 5.85(5.63,6.07) | 0.30(0.25,0.35) |
| South-Central Asia | India          | 2008-2012 | 7.23(6.94,7.52)    | 0.96(0.86,1.07) | 6.26(5.99,6.54)    | 5.79(5.60,5.98) | 5.28(5.10,5.46) | 0.47(0.42,0.53) |
| Western Asia       | Cyprus         | 2003-2012 | 7.60(6.88,8.32)    | 1.28(0.98,1.58) | 6.32(5.67,6.98)    | 1.21(0.92,1.51) | 0.57(0.36,0.77) | 0.53(0.34,0.72) |
| Western Asia       | Cyprus         | 2003-2007 | 7.44(6.39,8.49)    | 1.26(0.82,1.70) | 6.18(5.23,7.13)    | 1.30(0.86,1.75) | 0.55(0.25,0.84) | 0.55(0.26,0.84) |
| Western Asia       | Cyprus         | 2008-2012 | 7.69(6.70,8.68)    | 1.28(0.88,1.69) | 6.40(5.50,7.30)    | 1.13(0.75,1.52) | 0.58(0.30,0.85) | 0.52(0.26,0.79) |
| Western Asia       | Israel         | 2003-2012 | 10.55(10.22,10.88) | 2.19(2.04,2.34) | 8.35(8.06,8.65)    | 1.87(1.73,2.01) | 0.80(0.71,0.89) | 1.03(0.92,1.13) |
| Western Asia       | Israel         | 2003-2007 | 10.77(10.30,11.25) | 2.17(1.96,2.37) | 8.61(8.18,9.03)    | 1.90(1.70,2.09) | 0.82(0.70,0.95) | 1.04(0.89,1.19) |
| Western Asia       | Israel         | 2008-2012 | 9.60(9.18,10.02)   | 2.08(1.89,2.28) | 7.52(7.15,7.89)    | 1.68(1.50,1.85) | 0.69(0.58,0.80) | 0.93(0.80,1.05) |
| Western Asia       | Saudi Arabia   | 2003-2012 | 4.21(3.82,4.60)    | 1.06(0.87,1.26) | 3.14(2.81,3.48)    | 1.54(1.31,1.78) | 1.00(0.81,1.19) | 0.53(0.39,0.66) |
| Western Asia       | Saudi Arabia   | 2003-2007 | 4.81(4.14,5.48)    | 1.06(0.75,1.38) | 3.74(3.15,4.33)    | 1.83(1.42,2.23) | 1.32(0.98,1.66) | 0.51(0.29,0.73) |
| Western Asia       | Saudi Arabia   | 2008-2012 | 3.81(3.34,4.29)    | 1.08(0.82,1.34) | 2.73(2.34,3.13)    | 1.36(1.07,1.64) | 0.79(0.57,1.01) | 0.54(0.36,0.72) |
| Western Asia       | Turkey         | 2003-2012 | 14.62(14.19,15.05) | 2.39(2.22,2.57) | 12.23(11.83,12.62) | 2.15(1.98,2.32) | 1.52(1.37,1.66) | 0.57(0.48,0.66) |
| Western Asia       | Turkey         | 2003-2007 | 14.23(13.63,14.84) | 1.91(1.69,2.14) | 12.32(11.75,12.88) | 2.30(2.05,2.55) | 1.67(1.46,1.89) | 0.56(0.44,0.69) |
| Western Asia       | Turkey         | 2008-2012 | 14.40(13.86,14.94) | 2.66(2.43,2.90) | 11.74(11.25,12.23) | 1.93(1.72,2.14) | 1.33(1.16,1.50) | 0.56(0.45,0.68) |
| Eastern Europe     | Belarus        | 2003-2012 | 31.73(31.27,32.19) | 2.25(2.13,2.37) | 29.48(29.04,29.92) | 6.77(6.56,6.98) | 5.84(5.65,6.04) | 0.83(0.75,0.90) |
| Eastern Europe     | Belarus        | 2003-2007 | 33.31(32.64,33.99) | 2.46(2.28,2.65) | 30.85(30.20,31.50) | 6.65(6.34,6.96) | 5.76(5.47,6.04) | 0.82(0.71,0.93) |
| Eastern Europe     | Belarus        | 2008-2012 | 30.29(29.65,30.92) | 2.06(1.89,2.23) | 28.23(27.61,28.84) | 6.92(6.61,7.22) | 5.95(5.67,6.23) | 0.85(0.74,0.95) |
| Eastern Europe     | Bulgaria       | 2003-2012 | 15.16(14.85,15.46) | 1.89(1.78,2.00) | 13.27(12.99,13.55) | 2.60(2.47,2.73) | 1.86(1.75,1.97) | 0.70(0.63,0.76) |
| Eastern Europe     | Bulgaria       | 2003-2007 | 16.08(15.63,16.52) | 1.79(1.64,1.95) | 14.28(13.86,14.70) | 2.45(2.27,2.63) | 1.72(1.57,1.87) | 0.68(0.58,0.77) |
| Eastern Europe     | Bulgaria       | 2008-2012 | 14.26(13.85,14.68) | 1.99(1.83,2.15) | 12.28(11.89,12.66) | 2.74(2.55,2.93) | 1.99(1.83,2.15) | 0.71(0.61,0.80) |
| Eastern Europe     | Czech Republic | 2003-2012 | 11.27(11.03,11.50) | 1.91(1.82,2.01) | 9.35(9.14,9.56)    | 5.54(5.38,5.71) | 3.21(3.08,3.33) | 2.22(2.12,2.32) |
| Eastern Europe     | Czech Republic | 2003-2007 | 12.24(11.89,12.59) | 2.10(1.95,2.25) | 10.14(9.82,10.46)  | 5.28(5.05,5.52) | 3.16(2.98,3.35) | 2.00(1.86,2.15) |
| Eastern Europe     | Czech Republic | 2008-2012 | 10.39(10.08,10.69) | 1.74(1.61,1.86) | 8.65(8.37,8.93)    | 5.77(5.54,6.00) | 3.23(3.06,3.41) | 2.42(2.27,2.57) |
| Eastern Europe     | Poland         | 2003-2012 | 14.10(13.70,14.50) | 1.92(1.77,2.07) | 12.18(11.80,12.55) | 3.91(3.72,4.10) | 3.34(3.17,3.52) | 0.52(0.45,0.59) |
| Eastern Europe     | Poland         | 2003-2007 | 14.56(13.97,15.16) | 1.71(1.50,1.91) | 12.86(12.29,13.42) | 4.02(3.74,4.31) | 3.48(3.22,3.75) | 0.50(0.40,0.59) |
| Eastern Europe     | Poland         | 2008-2012 | 13.61(13.06,14.16) | 2.11(1.89,2.33) | 11.50(11.00,12.00) | 3.80(3.54,4.06) | 3.21(2.97,3.44) | 0.54(0.44,0.64) |

|                 |           |           |                    |                 |                    |                 |                 |                 |
|-----------------|-----------|-----------|--------------------|-----------------|--------------------|-----------------|-----------------|-----------------|
| Eastern Europe  | Slovakia  | 2003–2012 | 16.28(15.79,16.76) | 2.38(2.20,2.57) | 13.89(13.45,14.34) | 7.52(7.19,7.85) | 6.48(6.17,6.79) | 0.93(0.82,1.05) |
| Eastern Europe  | Slovakia  | 2003-2007 | 16.81(16.18,17.44) | 2.61(2.36,2.86) | 14.20(13.62,14.78) | 7.56(7.14,7.99) | 6.55(6.15,6.94) | 0.91(0.76,1.06) |
| Eastern Europe  | Slovakia  | 2008–2012 | 15.48(14.73,16.23) | 2.04(1.76,2.31) | 13.44(12.74,14.14) | 7.44(6.92,7.96) | 6.34(5.86,6.82) | 0.99(0.80,1.18) |
| Eastern Europe  | Ukraine   | 2003–2012 | 23.68(23.51,23.86) | 2.93(2.87,3.00) | 20.75(20.59,20.91) | 5.37(5.28,5.45) | 4.50(4.42,4.58) | 0.83(0.80,0.86) |
| Eastern Europe  | Ukraine   | 2003-2007 | 25.10(24.85,25.35) | 3.10(3.01,3.19) | 22.00(21.76,22.24) | 5.35(5.23,5.47) | 4.41(4.30,4.52) | 0.90(0.85,0.95) |
| Eastern Europe  | Ukraine   | 2008–2012 | 22.23(21.99,22.47) | 2.77(2.68,2.85) | 19.46(19.24,19.69) | 5.40(5.28,5.52) | 4.60(4.49,4.71) | 0.76(0.72,0.81) |
| Northern Europe | Denmark   | 2003–2012 | 7.19(6.95,7.44)    | 3.94(3.75,4.12) | 3.25(3.09,3.42)    | 6.50(6.27,6.74) | 2.85(2.70,3.01) | 3.45(3.29,3.62) |
| Northern Europe | Denmark   | 2003-2007 | 7.46(7.09,7.82)    | 3.92(3.65,4.19) | 3.54(3.29,3.78)    | 5.98(5.65,6.30) | 2.63(2.41,2.85) | 3.19(2.96,3.43) |
| Northern Europe | Denmark   | 2008–2012 | 6.95(6.62,7.28)    | 3.96(3.70,4.21) | 2.99(2.78,3.21)    | 6.96(6.63,7.30) | 3.05(2.82,3.27) | 3.68(3.44,3.92) |
| Northern Europe | Estonia   | 2003–2012 | 22.35(21.39,23.32) | 2.37(2.05,2.68) | 19.99(19.07,20.90) | 5.66(5.17,6.16) | 5.01(4.54,5.47) | 0.59(0.43,0.75) |
| Northern Europe | Estonia   | 2003-2007 | 23.00(21.59,24.41) | 2.28(1.83,2.72) | 20.73(19.39,22.06) | 5.08(4.41,5.75) | 4.46(3.83,5.09) | 0.57(0.34,0.80) |
| Northern Europe | Estonia   | 2008–2012 | 21.67(20.35,23.00) | 2.45(2.01,2.90) | 19.22(17.97,20.46) | 6.24(5.51,6.97) | 5.54(4.85,6.22) | 0.62(0.40,0.85) |
| Northern Europe | Iceland   | 2003–2012 | 7.37(6.25,8.49)    | 1.46(0.95,1.97) | 5.91(4.92,6.91)    | 6.34(5.25,7.42) | 1.57(1.03,2.11) | 4.56(3.64,5.48) |
| Northern Europe | Iceland   | 2003-2007 | 9.18(7.30,11.05)   | 1.70(0.88,2.51) | 7.48(5.79,9.17)    | 5.30(3.85,6.75) | 2.31(1.34,3.28) | 2.84(1.80,3.88) |
| Northern Europe | Iceland   | 2008–2012 | 5.90(4.56,7.25)    | 1.23(0.60,1.87) | 4.67(3.48,5.86)    | 7.23(5.65,8.81) | 0.97(0.39,1.55) | 6.00(4.56,7.44) |
| Northern Europe | Ireland   | 2003–2012 | 10.45(10.08,10.82) | 3.76(3.53,3.98) | 6.69(6.40,6.99)    | 7.88(7.56,8.21) | 2.63(2.44,2.82) | 5.08(4.82,5.34) |
| Northern Europe | Ireland   | 2003-2007 | 10.48(9.93,11.03)  | 3.18(2.87,3.48) | 7.30(6.84,7.76)    | 8.17(7.68,8.66) | 2.84(2.55,3.13) | 5.18(4.79,5.56) |
| Northern Europe | Ireland   | 2008–2012 | 10.44(9.93,10.95)  | 4.26(3.93,4.59) | 6.18(5.79,6.56)    | 7.65(7.21,8.09) | 2.47(2.22,2.72) | 4.99(4.64,5.35) |
| Northern Europe | Latvia    | 2003–2012 | 22.13(21.23,23.03) | 1.12(0.92,1.32) | 21.01(20.14,21.89) | 7.17(6.65,7.69) | 6.28(5.79,6.77) | 0.76(0.59,0.92) |
| Northern Europe | Latvia    | 2003-2007 | 24.34(23.10,25.59) | 1.21(0.94,1.49) | 23.13(21.92,24.34) | 6.62(5.96,7.28) | 5.86(5.23,6.48) | 0.69(0.48,0.90) |
| Northern Europe | Latvia    | 2008–2012 | 19.18(17.90,20.47) | 1.00(0.70,1.30) | 18.18(16.93,19.43) | 7.90(7.05,8.74) | 6.84(6.05,7.62) | 0.85(0.58,1.13) |
| Northern Europe | Lithuania | 2003–2012 | 24.15(23.50,24.81) | 1.37(1.22,1.53) | 22.78(22.14,23.41) | 7.36(6.99,7.73) | 6.37(6.03,6.72) | 0.87(0.74,0.99) |
| Northern Europe | Lithuania | 2003-2007 | 25.74(24.78,26.70) | 1.36(1.14,1.58) | 24.38(23.45,25.31) | 7.17(6.65,7.68) | 6.01(5.54,6.49) | 1.00(0.81,1.19) |
| Northern Europe | Lithuania | 2008–2012 | 22.59(21.69,23.48) | 1.39(1.17,1.61) | 21.20(20.33,22.07) | 7.59(7.06,8.13) | 6.78(6.27,7.28) | 0.74(0.57,0.90) |
| Northern Europe | Norway    | 2003–2012 | 7.12(6.86,7.39)    | 2.21(2.06,2.36) | 4.91(4.69,5.13)    | 3.87(3.67,4.08) | 1.41(1.29,1.53) | 2.36(2.20,2.52) |
| Northern Europe | Norway    | 2003-2007 | 7.74(7.33,8.14)    | 2.35(2.12,2.58) | 5.39(5.06,5.72)    | 3.69(3.40,3.98) | 1.44(1.26,1.63) | 2.14(1.93,2.36) |

|                 |          |           |                    |                 |                    |                 |                 |                 |
|-----------------|----------|-----------|--------------------|-----------------|--------------------|-----------------|-----------------|-----------------|
| Northern Europe | Norway   | 2008–2012 | 6.57(6.21,6.92)    | 2.07(1.87,2.28) | 4.49(4.20,4.78)    | 4.04(3.76,4.33) | 1.39(1.22,1.55) | 2.55(2.33,2.77) |
| Northern Europe | UK       | 2003–2012 | 8.35(8.27,8.43)    | 2.94(2.89,2.99) | 5.41(5.35,5.47)    | 9.66(9.57,9.75) | 2.31(2.26,2.35) | 7.14(7.07,7.22) |
| Northern Europe | UK       | 2003-2007 | 9.13(9.01,9.25)    | 3.12(3.05,3.19) | 6.01(5.92,6.10)    | 9.50(9.37,9.62) | 2.44(2.37,2.50) | 6.85(6.74,6.96) |
| Northern Europe | UK       | 2008–2012 | 7.65(7.54,7.75)    | 2.78(2.71,2.84) | 4.87(4.79,4.95)    | 9.82(9.69,9.94) | 2.19(2.13,2.25) | 7.41(7.30,7.52) |
| Southern Europe | Italy    | 2003–2012 | 13.57(13.38,13.75) | 1.83(1.76,1.90) | 11.73(11.56,11.90) | 3.24(3.15,3.34) | 2.19(2.11,2.26) | 0.98(0.93,1.03) |
| Southern Europe | Italy    | 2003-2007 | 14.88(14.59,15.16) | 1.87(1.76,1.97) | 13.01(12.74,13.27) | 3.56(3.41,3.70) | 2.52(2.40,2.65) | 0.97(0.90,1.05) |
| Southern Europe | Italy    | 2008–2012 | 12.48(12.24,12.71) | 1.81(1.71,1.90) | 10.67(10.45,10.89) | 2.98(2.85,3.10) | 1.90(1.80,2.00) | 1.00(0.93,1.07) |
| Southern Europe | Malta    | 2003–2012 | 8.85(7.85,9.84)    | 2.17(1.68,2.66) | 6.67(5.81,7.54)    | 3.34(2.72,3.97) | 1.30(0.91,1.70) | 2.01(1.53,2.50) |
| Southern Europe | Malta    | 2003-2007 | 8.42(7.00,9.83)    | 2.53(1.75,3.32) | 5.88(4.71,7.06)    | 3.33(2.39,4.27) | 1.18(0.62,1.73) | 2.10(1.35,2.85) |
| Southern Europe | Malta    | 2008–2012 | 9.19(7.79,10.60)   | 1.87(1.24,2.50) | 7.32(6.07,8.58)    | 3.43(2.58,4.29) | 1.45(0.88,2.02) | 1.98(1.34,2.62) |
| Southern Europe | Portugal | 2003–2012 | 20.87(18.45,23.30) | 2.51(1.67,3.34) | 18.37(16.09,20.65) |                 |                 |                 |
| Southern Europe | Portugal | 2003-2007 | 20.38(17.15,23.61) | 2.50(1.36,3.63) | 17.88(14.86,20.91) |                 |                 |                 |
| Southern Europe | Portugal | 2008–2012 | 21.49(17.82,25.16) | 2.56(1.31,3.81) | 18.93(15.48,22.39) |                 |                 |                 |
| Southern Europe | Slovenia | 2003–2012 | 17.06(16.43,17.69) | 2.99(2.73,3.26) | 14.07(13.49,14.64) | 4.36(4.04,4.68) | 3.44(3.15,3.73) | 0.82(0.68,0.96) |
| Southern Europe | Slovenia | 2003-2007 | 18.30(17.35,19.26) | 3.25(2.85,3.65) | 15.05(14.19,15.92) | 4.92(4.42,5.42) | 3.96(3.51,4.41) | 0.86(0.65,1.07) |
| Southern Europe | Slovenia | 2008–2012 | 15.94(15.10,16.78) | 2.76(2.41,3.12) | 13.18(12.41,13.94) | 3.87(3.45,4.30) | 2.98(2.61,3.36) | 0.80(0.61,0.98) |
| Southern Europe | Spain    | 2003–2012 | 11.73(11.49,11.96) | 1.95(1.86,2.05) | 9.78(9.56,9.99)    | 5.36(5.19,5.53) | 3.76(3.62,3.90) | 1.51(1.43,1.60) |
| Southern Europe | Spain    | 2003-2007 | 12.11(11.78,12.45) | 1.88(1.75,2.01) | 10.23(9.93,10.54)  | 5.69(5.45,5.93) | 4.09(3.88,4.30) | 1.54(1.41,1.66) |
| Southern Europe | Spain    | 2008–2012 | 11.31(10.98,11.65) | 2.02(1.88,2.17) | 9.29(8.99,9.59)    | 5.03(4.80,5.26) | 3.43(3.24,3.62) | 1.49(1.36,1.61) |
| Western Europe  | Austria  | 2003–2012 | 10.32(10.08,10.56) | 1.91(1.80,2.01) | 8.41(8.20,8.63)    | 4.70(4.53,4.87) | 2.75(2.62,2.88) | 1.85(1.74,1.95) |
| Western Europe  | Austria  | 2003-2007 | 11.15(10.79,11.51) | 1.82(1.67,1.96) | 9.33(9.00,9.66)    | 4.84(4.59,5.08) | 2.90(2.70,3.09) | 1.86(1.70,2.01) |
| Western Europe  | Austria  | 2008–2012 | 9.61(9.29,9.92)    | 1.98(1.84,2.13) | 7.62(7.34,7.90)    | 4.56(4.33,4.79) | 2.60(2.42,2.77) | 1.84(1.69,1.98) |
| Western Europe  | Belgium  | 2003–2012 | 8.92(8.71,9.12)    | 2.98(2.86,3.10) | 5.94(5.77,6.11)    | 7.62(7.42,7.82) | 3.92(3.78,4.06) | 3.54(3.41,3.68) |
| Western Europe  | Belgium  | 2003-2007 | 9.10(8.78,9.43)    | 2.64(2.46,2.81) | 6.47(6.20,6.74)    | 7.86(7.55,8.17) | 4.11(3.88,4.34) | 3.59(3.38,3.79) |
| Western Europe  | Belgium  | 2008–2012 | 8.79(8.51,9.06)    | 3.23(3.06,3.40) | 5.56(5.34,5.77)    | 7.43(7.18,7.69) | 3.78(3.60,3.97) | 3.50(3.33,3.68) |
| Western Europe  | France   | 2003–2012 | 8.17(7.96,8.39)    | 2.61(2.49,2.73) | 5.57(5.39,5.74)    | 7.92(7.71,8.14) | 5.59(5.41,5.78) | 2.20(2.09,2.31) |

|                       |                 |           |                    |                 |                    |                   |                  |                 |
|-----------------------|-----------------|-----------|--------------------|-----------------|--------------------|-------------------|------------------|-----------------|
| Western Europe        | France          | 2003-2007 | 8.62(8.30,8.93)    | 2.50(2.33,2.67) | 6.12(5.85,6.38)    | 8.30(7.98,8.61)   | 6.09(5.81,6.36)  | 2.07(1.91,2.22) |
| Western Europe        | France          | 2008-2012 | 7.77(7.48,8.06)    | 2.71(2.54,2.88) | 5.07(4.83,5.30)    | 7.55(7.26,7.84)   | 5.12(4.88,5.36)  | 2.31(2.16,2.47) |
| Western Europe        | Germany         | 2003-2012 | 10.95(10.74,11.16) | 3.26(3.14,3.38) | 7.69(7.52,7.87)    | 6.54(6.37,6.71)   | 3.68(3.56,3.81)  | 2.72(2.61,2.82) |
| Western Europe        | Germany         | 2003-2007 | 11.46(11.15,11.77) | 3.08(2.91,3.24) | 8.38(8.12,8.65)    | 6.49(6.24,6.73)   | 3.97(3.78,4.16)  | 2.37(2.22,2.51) |
| Western Europe        | Germany         | 2008-2012 | 10.53(10.24,10.81) | 3.42(3.26,3.59) | 7.10(6.87,7.33)    | 6.59(6.36,6.82)   | 3.42(3.25,3.58)  | 3.04(2.88,3.19) |
| Western Europe        | Switzerland     | 2003-2012 | 7.48(7.18,7.78)    | 2.42(2.25,2.59) | 5.06(4.82,5.30)    | 6.20(5.93,6.47)   | 3.39(3.19,3.60)  | 2.67(2.50,2.85) |
| Western Europe        | Switzerland     | 2003-2007 | 7.62(7.19,8.06)    | 2.36(2.12,2.60) | 5.26(4.90,5.62)    | 6.16(5.76,6.55)   | 3.58(3.27,3.89)  | 2.38(2.14,2.62) |
| Western Europe        | Switzerland     | 2008-2012 | 7.36(6.95,7.77)    | 2.47(2.23,2.71) | 4.89(4.56,5.22)    | 6.23(5.85,6.60)   | 3.22(2.95,3.49)  | 2.94(2.68,3.19) |
| Western Europe        | The Netherlands | 2003-2012 | 8.74(8.58,8.89)    | 2.93(2.83,3.02) | 5.81(5.68,5.94)    | 9.23(9.07,9.39)   | 2.47(2.38,2.55)  | 6.59(6.45,6.72) |
| Western Europe        | The Netherlands | 2003-2007 | 9.31(9.07,9.54)    | 3.11(2.97,3.25) | 6.20(6.01,6.39)    | 8.60(8.37,8.83)   | 2.45(2.33,2.57)  | 5.99(5.80,6.18) |
| Western Europe        | The Netherlands | 2008-2012 | 8.24(8.03,8.45)    | 2.76(2.64,2.88) | 5.48(5.31,5.65)    | 9.78(9.55,10.01)  | 2.47(2.36,2.59)  | 7.11(6.91,7.31) |
| Australia/New Zealand | Australia       | 2003-2012 | 7.38(7.25,7.51)    | 2.75(2.66,2.83) | 4.63(4.53,4.74)    | 5.27(5.16,5.39)   | 1.73(1.66,1.79)  | 3.44(3.35,3.53) |
| Australia/New Zealand | Australia       | 2003-2007 | 7.63(7.44,7.83)    | 2.74(2.61,2.86) | 4.90(4.74,5.06)    | 5.16(4.99,5.32)   | 1.82(1.72,1.91)  | 3.23(3.10,3.36) |
| Australia/New Zealand | Australia       | 2008-2012 | 7.16(6.98,7.34)    | 2.75(2.64,2.87) | 4.40(4.26,4.54)    | 5.37(5.21,5.53)   | 1.65(1.56,1.74)  | 3.62(3.49,3.75) |
| Australia/New Zealand | New Zealand     | 2003-2012 | 7.28(6.98,7.59)    | 2.68(2.49,2.87) | 4.60(4.36,4.85)    | 5.45(5.19,5.71)   | 1.38(1.25,1.51)  | 3.91(3.69,4.13) |
| Australia/New Zealand | New Zealand     | 2003-2007 | 7.59(7.13,8.05)    | 2.68(2.41,2.96) | 4.90(4.54,5.27)    | 5.52(5.13,5.90)   | 1.51(1.31,1.71)  | 3.89(3.56,4.21) |
| Australia/New Zealand | New Zealand     | 2008-2012 | 7.04(6.62,7.45)    | 2.68(2.43,2.94) | 4.35(4.03,4.68)    | 5.41(5.05,5.76)   | 1.28(1.11,1.45)  | 3.94(3.64,4.25) |
| South America         | Argentina       | 2003-2012 | 12.90(12.15,13.65) | 1.21(0.98,1.44) | 11.68(10.97,12.40) | 5.60(5.21,5.98)   | 3.49(3.18,3.80)  | 2.09(1.85,2.32) |
| South America         | Argentina       | 2003-2007 | 13.08(11.98,14.17) | 0.92(0.63,1.22) | 12.15(11.10,13.21) | 6.47(5.85,7.09)   | 4.45(3.93,4.96)  | 2.00(1.66,2.33) |
| South America         | Argentina       | 2008-2012 | 12.74(11.71,13.78) | 1.48(1.13,1.84) | 11.26(10.29,12.23) | 4.86(4.37,5.35)   | 2.70(2.33,3.06)  | 2.15(1.82,2.48) |
| South America         | Brazil          | 2003-2012 | 17.83(16.72,18.95) | 1.88(1.51,2.24) | 15.96(14.90,17.01) | 7.44(6.73,8.15)   | 6.96(6.28,7.65)  | 0.39(0.21,0.57) |
| South America         | Brazil          | 2003-2007 | 22.05(20.17,23.93) | 2.29(1.70,2.88) | 19.76(17.97,21.54) | 9.17(7.97,10.37)  | 8.80(7.63,9.97)  | 0.28(0.07,0.49) |
| South America         | Brazil          | 2008-2012 | 15.69(14.13,17.24) | 1.48(1.04,1.92) | 14.20(12.71,15.69) | 6.81(5.75,7.87)   | 6.06(5.11,7.02)  | 0.66(0.22,1.11) |
| South America         | Chile           | 2003-2012 | 45.11(42.45,47.77) | 4.81(3.97,5.64) | 40.31(37.77,42.84) | 10.55(9.06,12.04) | 8.81(7.43,10.18) | 1.53(0.96,2.11) |
| South America         | Chile           | 2003-2007 | 39.46(36.57,42.36) | 4.26(3.34,5.18) | 35.20(32.45,37.95) | 8.46(7.21,9.72)   | 7.01(5.85,8.18)  | 1.26(0.80,1.72) |
| South America         | Chile           | 2008-2012 | 37.34(34.88,39.81) | 4.10(3.29,4.91) | 33.24(30.92,35.57) | 6.09(5.24,6.94)   | 5.14(4.36,5.93)  | 0.71(0.43,0.99) |

|               |          |           |                    |                 |                    |                 |                 |                 |
|---------------|----------|-----------|--------------------|-----------------|--------------------|-----------------|-----------------|-----------------|
| South America | Colombia | 2003–2012 | 22.00(21.19,22.81) | 2.32(2.06,2.58) | 19.68(18.91,20.45) | 2.50(2.25,2.74) | 1.43(1.25,1.62) | 1.04(0.88,1.20) |
| South America | Colombia | 2003-2007 | 24.68(23.40,25.95) | 2.37(1.98,2.76) | 22.31(21.09,23.52) | 3.14(2.73,3.55) | 1.86(1.55,2.18) | 1.25(0.98,1.51) |
| South America | Colombia | 2008–2012 | 19.78(18.75,20.82) | 2.27(1.92,2.62) | 17.51(16.53,18.49) | 1.95(1.66,2.25) | 1.06(0.84,1.28) | 0.87(0.68,1.06) |
| South America | Ecuador  | 2003–2012 | 25.45(24.21,26.68) | 1.45(1.16,1.75) | 24.00(22.80,25.20) | 2.31(1.90,2.72) | 1.69(1.33,2.05) | 0.58(0.39,0.78) |
| South America | Ecuador  | 2003-2007 | 24.24(22.66,25.82) | 1.26(0.90,1.63) | 22.97(21.43,24.51) | 2.47(1.92,3.02) | 1.95(1.47,2.44) | 0.45(0.20,0.69) |
| South America | Ecuador  | 2008–2012 | 21.30(19.91,22.69) | 1.32(0.97,1.68) | 19.98(18.64,21.32) | 1.71(1.28,2.14) | 1.03(0.69,1.36) | 0.68(0.40,0.96) |

Note: ESCC, esophageal squamous cell carcinoma; EAC, esophageal adenocarcinoma; GCC, gastric cardia cancer; GNCC, gastric non-cardia cancer

\*Using Segi's World Standard Population as reference

**Supplementary Table 3. National estimations of age-standardized incidence rates and 95%CIs for esophageal cancer and gastric cancer in females, overall and by subtype and subsite (2003-2012)**

| World region     | Country           | Period    | Age-standardized incidence rate (95%CIs) |                 |                    |                   |                 |                 |
|------------------|-------------------|-----------|------------------------------------------|-----------------|--------------------|-------------------|-----------------|-----------------|
|                  |                   |           | Gastric cancer                           | GCC             | GNCC               | Esophageal cancer | ESCC            | EAC             |
| Total            | Total             | 2003–2012 | 6.67(6.65,6.69)                          | 0.64(0.63,0.65) | 6.03(6.01,6.05)    | 1.49(1.48,1.50)   | 1.00(0.99,1.00) | 0.44(0.44,0.45) |
| Total            | Total             | 2003-2007 | 6.88(6.85,6.91)                          | 0.65(0.64,0.66) | 6.23(6.20,6.26)    | 1.52(1.51,1.54)   | 1.04(1.02,1.05) | 0.44(0.43,0.45) |
| Total            | Total             | 2008–2012 | 6.49(6.46,6.52)                          | 0.63(0.62,0.64) | 5.86(5.83,5.88)    | 1.46(1.44,1.47)   | 0.96(0.95,0.97) | 0.45(0.44,0.45) |
| Total            | Portugal          | 2003–2012 | 8.56(7.12,9.99)                          | 0.37(0.08,0.66) | 8.18(6.78,9.59)    |                   |                 |                 |
| Total            | Portugal          | 2003-2007 | 8.82(6.83,10.81)                         | 0.59(0.07,1.10) | 8.23(6.31,10.15)   |                   |                 |                 |
| Total            | Portugal          | 2008–2012 | 8.20(6.14,10.25)                         | 0.12(0.00,0.28) | 8.08(6.03,10.12)   |                   |                 |                 |
| Northern America | Canada            | 2003–2012 | 3.10(3.02,3.18)                          | 0.61(0.57,0.64) | 2.49(2.43,2.56)    | 1.23(1.18,1.28)   | 0.71(0.67,0.75) | 0.48(0.45,0.51) |
| Northern America | Canada            | 2003-2007 | 3.16(3.04,3.27)                          | 0.56(0.51,0.61) | 2.60(2.49,2.70)    | 1.22(1.15,1.29)   | 0.74(0.69,0.79) | 0.44(0.40,0.48) |
| Northern America | Canada            | 2008–2012 | 3.05(2.95,3.16)                          | 0.64(0.60,0.69) | 2.41(2.32,2.50)    | 1.24(1.18,1.31)   | 0.68(0.64,0.73) | 0.51(0.47,0.55) |
| Northern America | USA               | 2003–2012 | 2.87(2.84,2.89)                          | 0.50(0.49,0.51) | 2.37(2.35,2.39)    | 1.18(1.17,1.20)   | 0.65(0.64,0.66) | 0.49(0.49,0.50) |
| Northern America | USA               | 2003-2007 | 2.91(2.87,2.94)                          | 0.49(0.48,0.50) | 2.42(2.39,2.45)    | 1.25(1.23,1.27)   | 0.71(0.69,0.72) | 0.50(0.49,0.52) |
| Northern America | USA               | 2008–2012 | 2.83(2.80,2.87)                          | 0.51(0.49,0.52) | 2.33(2.30,2.36)    | 1.13(1.11,1.15)   | 0.61(0.59,0.62) | 0.49(0.47,0.50) |
| Eastern Asia     | China             | 2003–2012 | 10.41(10.28,10.53)                       | 1.17(1.12,1.21) | 9.24(9.12,9.36)    | 4.19(4.10,4.28)   | 3.93(3.84,4.01) | 0.19(0.17,0.21) |
| Eastern Asia     | China             | 2003-2007 | 11.10(10.90,11.30)                       | 1.31(1.24,1.38) | 9.79(9.61,9.97)    | 4.73(4.59,4.87)   | 4.48(4.35,4.62) | 0.16(0.14,0.19) |
| Eastern Asia     | China             | 2008–2012 | 9.82(9.65,9.99)                          | 1.06(1.00,1.12) | 8.76(8.60,8.93)    | 3.75(3.64,3.87)   | 3.48(3.37,3.59) | 0.21(0.19,0.24) |
| Eastern Asia     | Japan             | 2003–2012 | 20.28(20.09,20.48)                       | 0.99(0.95,1.04) | 19.29(19.10,19.48) | 1.89(1.83,1.95)   | 1.76(1.70,1.82) | 0.07(0.06,0.08) |
| Eastern Asia     | Japan             | 2003-2007 | 20.47(20.16,20.77)                       | 0.97(0.90,1.04) | 19.50(19.20,19.79) | 1.76(1.67,1.85)   | 1.62(1.53,1.70) | 0.07(0.06,0.09) |
| Eastern Asia     | Japan             | 2008–2012 | 20.12(19.86,20.38)                       | 1.00(0.94,1.06) | 19.12(18.86,19.37) | 1.98(1.90,2.06)   | 1.87(1.79,1.95) | 0.07(0.06,0.08) |
| Eastern Asia     | Republic of Korea | 2003–2012 | 25.23(25.06,25.40)                       | 0.79(0.76,0.81) | 24.44(24.28,24.61) | 0.47(0.45,0.49)   | 0.40(0.38,0.42) | 0.04(0.04,0.05) |
| Eastern Asia     | Republic of Korea | 2003-2007 | 25.42(25.18,25.67)                       | 0.79(0.74,0.83) | 24.64(24.40,24.88) | 0.49(0.46,0.53)   | 0.42(0.39,0.45) | 0.05(0.04,0.06) |
| Eastern Asia     | Republic of Korea | 2008–2012 | 25.03(24.81,25.26)                       | 0.78(0.74,0.82) | 24.25(24.03,24.48) | 0.45(0.42,0.48)   | 0.39(0.36,0.42) | 0.03(0.03,0.04) |

|                    |                |           |                    |                 |                    |                 |                 |                 |
|--------------------|----------------|-----------|--------------------|-----------------|--------------------|-----------------|-----------------|-----------------|
| South-Eastern Asia | Thailand       | 2003–2012 | 2.91(2.66,3.17)    | 0.26(0.18,0.34) | 2.65(2.41,2.90)    | 0.57(0.51,0.62) | 0.49(0.44,0.54) | 0.04(0.03,0.06) |
| South-Eastern Asia | Thailand       | 2003–2007 | 3.17(2.76,3.58)    | 0.28(0.15,0.40) | 2.89(2.51,3.28)    | 0.63(0.55,0.71) | 0.53(0.45,0.61) | 0.05(0.03,0.07) |
| South-Eastern Asia | Thailand       | 2008–2012 | 2.73(2.40,3.06)    | 0.25(0.15,0.35) | 2.48(2.17,2.79)    | 0.51(0.43,0.58) | 0.45(0.38,0.52) | 0.04(0.02,0.06) |
| South-Central Asia | India          | 2003–2012 | 3.76(3.61,3.92)    | 0.33(0.28,0.37) | 3.43(3.29,3.58)    | 3.84(3.73,3.95) | 3.68(3.57,3.79) | 0.14(0.12,0.16) |
| South-Central Asia | India          | 2003–2007 | 3.82(3.59,4.06)    | 0.28(0.22,0.35) | 3.54(3.31,3.76)    | 4.08(3.89,4.26) | 3.92(3.74,4.09) | 0.15(0.11,0.18) |
| South-Central Asia | India          | 2008–2012 | 3.71(3.51,3.92)    | 0.36(0.30,0.43) | 3.35(3.16,3.55)    | 3.67(3.52,3.82) | 3.51(3.37,3.66) | 0.14(0.11,0.16) |
| Western Asia       | Cyprus         | 2003–2012 | 4.18(3.67,4.69)    | 0.22(0.10,0.34) | 3.96(3.47,4.46)    | 0.39(0.23,0.55) | 0.30(0.16,0.44) | 0.09(0.01,0.16) |
| Western Asia       | Cyprus         | 2003–2007 | 3.46(2.76,4.15)    | 0.13(0.00,0.27) | 3.33(2.65,4.01)    | 0.34(0.12,0.55) | 0.23(0.04,0.41) | 0.11(0.00,0.23) |
| Western Asia       | Cyprus         | 2008–2012 | 4.81(4.07,5.54)    | 0.30(0.12,0.49) | 4.50(3.79,5.22)    | 0.43(0.20,0.65) | 0.37(0.16,0.58) | 0.06(0.00,0.14) |
| Western Asia       | Israel         | 2003–2012 | 5.79(5.56,6.01)    | 0.71(0.63,0.78) | 5.08(4.87,5.29)    | 0.93(0.84,1.02) | 0.68(0.61,0.76) | 0.22(0.18,0.26) |
| Western Asia       | Israel         | 2003–2007 | 5.92(5.60,6.25)    | 0.75(0.63,0.87) | 5.17(4.87,5.48)    | 0.96(0.84,1.09) | 0.69(0.58,0.79) | 0.25(0.19,0.32) |
| Western Asia       | Israel         | 2008–2012 | 5.31(5.02,5.60)    | 0.62(0.52,0.71) | 4.69(4.42,4.97)    | 0.80(0.69,0.90) | 0.60(0.51,0.69) | 0.17(0.12,0.22) |
| Western Asia       | Saudi Arabia   | 2003–2012 | 2.30(2.00,2.59)    | 0.33(0.21,0.44) | 1.97(1.70,2.24)    | 1.23(1.00,1.45) | 1.00(0.80,1.21) | 0.22(0.13,0.30) |
| Western Asia       | Saudi Arabia   | 2003–2007 | 2.43(1.95,2.90)    | 0.39(0.20,0.58) | 2.04(1.60,2.47)    | 1.36(0.99,1.73) | 1.20(0.85,1.55) | 0.16(0.04,0.29) |
| Western Asia       | Saudi Arabia   | 2008–2012 | 2.20(1.83,2.58)    | 0.27(0.14,0.41) | 1.93(1.58,2.28)    | 1.10(0.83,1.37) | 0.85(0.60,1.09) | 0.24(0.13,0.36) |
| Western Asia       | Turkey         | 2003–2012 | 7.10(6.83,7.37)    | 0.93(0.84,1.03) | 6.17(5.91,6.42)    | 1.28(1.16,1.40) | 1.11(1.00,1.22) | 0.14(0.10,0.18) |
| Western Asia       | Turkey         | 2003–2007 | 7.33(6.92,7.73)    | 0.87(0.72,1.01) | 6.46(6.08,6.84)    | 1.40(1.22,1.59) | 1.29(1.12,1.47) | 0.10(0.04,0.15) |
| Western Asia       | Turkey         | 2008–2012 | 6.79(6.44,7.14)    | 0.97(0.84,1.11) | 5.82(5.50,6.14)    | 1.17(1.02,1.32) | 0.98(0.84,1.11) | 0.16(0.10,0.21) |
| Eastern Europe     | Belarus        | 2003–2012 | 13.16(12.92,13.40) | 0.62(0.57,0.68) | 12.54(12.30,12.77) | 0.38(0.34,0.42) | 0.28(0.25,0.32) | 0.09(0.07,0.11) |
| Eastern Europe     | Belarus        | 2003–2007 | 13.79(13.43,14.14) | 0.67(0.59,0.75) | 13.12(12.77,13.46) | 0.39(0.33,0.45) | 0.28(0.23,0.33) | 0.11(0.08,0.14) |
| Eastern Europe     | Belarus        | 2008–2012 | 12.54(12.20,12.87) | 0.57(0.50,0.64) | 11.97(11.64,12.29) | 0.36(0.30,0.41) | 0.28(0.23,0.33) | 0.07(0.05,0.09) |
| Eastern Europe     | Bulgaria       | 2003–2012 | 6.92(6.73,7.11)    | 0.60(0.54,0.66) | 6.32(6.14,6.50)    | 0.45(0.40,0.50) | 0.34(0.29,0.38) | 0.10(0.08,0.12) |
| Eastern Europe     | Bulgaria       | 2003–2007 | 7.30(7.03,7.58)    | 0.53(0.45,0.60) | 6.78(6.52,7.04)    | 0.42(0.36,0.49) | 0.30(0.24,0.35) | 0.12(0.09,0.15) |
| Eastern Europe     | Bulgaria       | 2008–2012 | 6.58(6.32,6.84)    | 0.68(0.59,0.76) | 5.90(5.66,6.15)    | 0.48(0.41,0.55) | 0.38(0.31,0.44) | 0.08(0.06,0.11) |
| Eastern Europe     | Czech Republic | 2003–2012 | 5.70(5.55,5.85)    | 0.50(0.45,0.54) | 5.20(5.06,5.35)    | 0.86(0.80,0.92) | 0.58(0.53,0.63) | 0.26(0.22,0.29) |
| Eastern Europe     | Czech Republic | 2003–2007 | 5.98(5.76,6.20)    | 0.49(0.43,0.55) | 5.49(5.27,5.70)    | 0.77(0.69,0.85) | 0.52(0.45,0.59) | 0.23(0.19,0.27) |



|                 |                |           |                    |                 |                    |                 |                 |                 |
|-----------------|----------------|-----------|--------------------|-----------------|--------------------|-----------------|-----------------|-----------------|
| Eastern Europe  | Czech Republic | 2008–2012 | 5.45(5.25,5.66)    | 0.50(0.44,0.56) | 4.95(4.76,5.15)    | 0.95(0.87,1.04) | 0.64(0.57,0.71) | 0.28(0.24,0.33) |
| Eastern Europe  | Poland         | 2003–2012 | 5.55(5.33,5.78)    | 0.39(0.33,0.45) | 5.16(4.95,5.38)    | 0.61(0.55,0.68) | 0.52(0.46,0.58) | 0.08(0.06,0.11) |
| Eastern Europe  | Poland         | 2003–2007 | 5.84(5.51,6.17)    | 0.40(0.31,0.49) | 5.44(5.13,5.76)    | 0.61(0.52,0.71) | 0.50(0.41,0.58) | 0.10(0.06,0.14) |
| Eastern Europe  | Poland         | 2008–2012 | 5.32(5.01,5.62)    | 0.37(0.29,0.45) | 4.94(4.65,5.24)    | 0.62(0.53,0.71) | 0.55(0.46,0.64) | 0.07(0.04,0.10) |
| Eastern Europe  | Slovakia       | 2003–2012 | 7.31(7.03,7.58)    | 0.61(0.53,0.69) | 6.70(6.43,6.96)    | 0.66(0.57,0.75) | 0.54(0.46,0.62) | 0.11(0.08,0.15) |
| Eastern Europe  | Slovakia       | 2003–2007 | 7.36(7.00,7.72)    | 0.62(0.52,0.73) | 6.74(6.40,7.08)    | 0.65(0.54,0.76) | 0.54(0.44,0.64) | 0.11(0.07,0.15) |
| Eastern Europe  | Slovakia       | 2008–2012 | 7.19(6.75,7.64)    | 0.58(0.45,0.71) | 6.61(6.19,7.04)    | 0.67(0.53,0.81) | 0.54(0.41,0.66) | 0.12(0.06,0.18) |
| Eastern Europe  | Ukraine        | 2003–2012 | 9.88(9.78,9.97)    | 0.84(0.81,0.87) | 9.04(8.95,9.13)    | 0.42(0.40,0.44) | 0.29(0.27,0.30) | 0.13(0.12,0.14) |
| Eastern Europe  | Ukraine        | 2003–2007 | 10.54(10.40,10.68) | 0.91(0.87,0.96) | 9.63(9.49,9.76)    | 0.43(0.40,0.45) | 0.27(0.25,0.29) | 0.15(0.13,0.16) |
| Eastern Europe  | Ukraine        | 2008–2012 | 9.18(9.05,9.31)    | 0.76(0.72,0.79) | 8.43(8.30,8.55)    | 0.41(0.38,0.44) | 0.30(0.28,0.32) | 0.11(0.10,0.12) |
| Northern Europe | Denmark        | 2003–2012 | 3.22(3.06,3.38)    | 0.89(0.80,0.97) | 2.33(2.20,2.47)    | 2.08(1.96,2.21) | 1.34(1.23,1.44) | 0.67(0.60,0.74) |
| Northern Europe | Denmark        | 2003–2007 | 3.45(3.21,3.69)    | 0.91(0.78,1.03) | 2.54(2.34,2.75)    | 2.07(1.89,2.25) | 1.36(1.21,1.51) | 0.64(0.54,0.74) |
| Northern Europe | Denmark        | 2008–2012 | 3.02(2.80,3.23)    | 0.87(0.76,0.98) | 2.15(1.97,2.33)    | 2.09(1.92,2.27) | 1.31(1.17,1.46) | 0.70(0.60,0.80) |
| Northern Europe | Estonia        | 2003–2012 | 10.80(10.23,11.37) | 0.63(0.50,0.77) | 10.17(9.61,10.72)  | 0.68(0.55,0.82) | 0.59(0.46,0.72) | 0.08(0.03,0.12) |
| Northern Europe | Estonia        | 2003–2007 | 11.72(10.87,12.56) | 0.71(0.51,0.92) | 11.00(10.18,11.82) | 0.64(0.45,0.83) | 0.55(0.38,0.73) | 0.08(0.02,0.15) |
| Northern Europe | Estonia        | 2008–2012 | 9.84(9.08,10.61)   | 0.56(0.39,0.74) | 9.28(8.54,10.02)   | 0.72(0.52,0.92) | 0.61(0.43,0.80) | 0.07(0.02,0.12) |
| Northern Europe | Iceland        | 2003–2012 | 4.63(3.74,5.52)    | 0.39(0.14,0.63) | 4.25(3.39,5.10)    | 1.48(1.00,1.96) | 0.81(0.46,1.16) | 0.60(0.29,0.90) |
| Northern Europe | Iceland        | 2003–2007 | 5.01(3.67,6.35)    | 0.51(0.10,0.93) | 4.49(3.22,5.77)    | 1.77(0.97,2.57) | 0.91(0.36,1.46) | 0.73(0.20,1.26) |
| Northern Europe | Iceland        | 2008–2012 | 4.29(3.10,5.47)    | 0.27(0.00,0.54) | 4.02(2.86,5.17)    | 1.22(0.66,1.79) | 0.71(0.27,1.15) | 0.48(0.13,0.82) |
| Northern Europe | Ireland        | 2003–2012 | 4.95(4.71,5.20)    | 1.25(1.13,1.37) | 3.70(3.49,3.91)    | 3.38(3.18,3.58) | 2.21(2.05,2.38) | 1.05(0.94,1.16) |
| Northern Europe | Ireland        | 2003–2007 | 4.98(4.62,5.34)    | 1.13(0.96,1.30) | 3.85(3.53,4.17)    | 3.50(3.20,3.79) | 2.33(2.09,2.57) | 1.08(0.92,1.25) |
| Northern Europe | Ireland        | 2008–2012 | 4.93(4.60,5.27)    | 1.36(1.19,1.53) | 3.57(3.29,3.86)    | 3.28(3.01,3.55) | 2.10(1.89,2.32) | 1.03(0.88,1.18) |
| Northern Europe | Latvia         | 2003–2012 | 9.85(9.35,10.34)   | 0.26(0.18,0.34) | 9.58(9.09,10.07)   | 0.68(0.55,0.80) | 0.57(0.45,0.69) | 0.08(0.04,0.12) |
| Northern Europe | Latvia         | 2003–2007 | 10.56(9.89,11.23)  | 0.23(0.13,0.32) | 10.33(9.67,11.00)  | 0.77(0.60,0.95) | 0.65(0.49,0.82) | 0.10(0.04,0.16) |
| Northern Europe | Latvia         | 2008–2012 | 8.92(8.17,9.66)    | 0.31(0.17,0.46) | 8.60(7.87,9.34)    | 0.55(0.37,0.73) | 0.46(0.29,0.62) | 0.05(0.01,0.09) |
| Northern Europe | Lithuania      | 2003–2012 | 10.19(9.83,10.55)  | 0.29(0.23,0.35) | 9.90(9.55,10.26)   | 0.75(0.65,0.85) | 0.59(0.50,0.68) | 0.14(0.10,0.18) |

|                 |           |           |                   |                 |                   |                 |                 |                 |
|-----------------|-----------|-----------|-------------------|-----------------|-------------------|-----------------|-----------------|-----------------|
| Northern Europe | Lithuania | 2003–2007 | 10.39(9.88,10.89) | 0.30(0.21,0.39) | 10.08(9.58,10.58) | 0.67(0.54,0.80) | 0.53(0.41,0.65) | 0.12(0.07,0.16) |
| Northern Europe | Lithuania | 2008–2012 | 10.05(9.53,10.56) | 0.28(0.19,0.36) | 9.77(9.26,10.28)  | 0.84(0.69,0.99) | 0.66(0.52,0.80) | 0.16(0.10,0.22) |
| Northern Europe | Norway    | 2003–2012 | 3.78(3.59,3.97)   | 0.59(0.51,0.67) | 3.18(3.01,3.36)   | 1.11(1.00,1.21) | 0.63(0.55,0.71) | 0.44(0.37,0.50) |
| Northern Europe | Norway    | 2003–2007 | 4.18(3.89,4.47)   | 0.65(0.53,0.77) | 3.54(3.27,3.80)   | 1.03(0.89,1.18) | 0.63(0.52,0.75) | 0.36(0.28,0.44) |
| Northern Europe | Norway    | 2008–2012 | 3.40(3.15,3.64)   | 0.54(0.44,0.64) | 2.86(2.63,3.08)   | 1.17(1.03,1.32) | 0.62(0.51,0.73) | 0.51(0.41,0.60) |
| Northern Europe | UK        | 2003–2012 | 3.50(3.45,3.55)   | 0.74(0.71,0.76) | 2.76(2.72,2.81)   | 3.57(3.52,3.62) | 2.02(1.98,2.06) | 1.41(1.38,1.44) |
| Northern Europe | UK        | 2003–2007 | 3.77(3.70,3.84)   | 0.80(0.77,0.84) | 2.97(2.90,3.03)   | 3.62(3.55,3.70) | 2.12(2.06,2.17) | 1.37(1.33,1.41) |
| Northern Europe | UK        | 2008–2012 | 3.24(3.18,3.31)   | 0.67(0.64,0.70) | 2.57(2.52,2.63)   | 3.52(3.45,3.59) | 1.93(1.88,1.98) | 1.45(1.41,1.49) |
| Southern Europe | Italy     | 2003–2012 | 6.97(6.84,7.10)   | 0.43(0.40,0.46) | 6.54(6.42,6.66)   | 0.79(0.75,0.84) | 0.61(0.57,0.65) | 0.14(0.13,0.16) |
| Southern Europe | Italy     | 2003–2007 | 7.52(7.33,7.72)   | 0.44(0.39,0.49) | 7.08(6.90,7.27)   | 0.82(0.76,0.89) | 0.63(0.57,0.69) | 0.13(0.11,0.16) |
| Southern Europe | Italy     | 2008–2012 | 6.50(6.33,6.66)   | 0.42(0.38,0.46) | 6.08(5.92,6.24)   | 0.77(0.71,0.83) | 0.59(0.54,0.64) | 0.15(0.13,0.18) |
| Southern Europe | Malta     | 2003–2012 | 4.01(3.38,4.64)   | 0.35(0.17,0.53) | 3.66(3.05,4.27)   | 0.81(0.54,1.07) | 0.46(0.27,0.66) | 0.30(0.13,0.47) |
| Southern Europe | Malta     | 2003–2007 | 4.08(3.17,4.99)   | 0.36(0.10,0.63) | 3.72(2.84,4.59)   | 0.88(0.46,1.30) | 0.69(0.32,1.05) | 0.19(0.00,0.41) |
| Southern Europe | Malta     | 2008–2012 | 3.94(3.07,4.82)   | 0.33(0.08,0.57) | 3.61(2.77,4.45)   | 0.76(0.40,1.12) | 0.27(0.08,0.45) | 0.42(0.14,0.71) |
| Southern Europe | Slovenia  | 2003–2012 | 7.35(6.97,7.74)   | 0.72(0.60,0.85) | 6.63(6.27,6.99)   | 0.68(0.56,0.80) | 0.57(0.46,0.67) | 0.08(0.04,0.12) |
| Southern Europe | Slovenia  | 2003–2007 | 7.63(7.07,8.19)   | 0.66(0.49,0.83) | 6.97(6.44,7.51)   | 0.71(0.53,0.88) | 0.59(0.43,0.75) | 0.10(0.04,0.16) |
| Southern Europe | Slovenia  | 2008–2012 | 7.07(6.55,7.60)   | 0.78(0.60,0.97) | 6.29(5.80,6.78)   | 0.66(0.50,0.82) | 0.54(0.40,0.69) | 0.06(0.02,0.10) |
| Southern Europe | Spain     | 2003–2012 | 5.20(5.05,5.35)   | 0.37(0.33,0.41) | 4.83(4.68,4.97)   | 0.73(0.67,0.79) | 0.53(0.48,0.59) | 0.17(0.14,0.20) |
| Southern Europe | Spain     | 2003–2007 | 5.24(5.03,5.45)   | 0.37(0.32,0.43) | 4.87(4.67,5.07)   | 0.67(0.60,0.75) | 0.49(0.42,0.55) | 0.17(0.13,0.20) |
| Southern Europe | Spain     | 2008–2012 | 5.15(4.93,5.36)   | 0.37(0.31,0.43) | 4.78(4.57,4.99)   | 0.79(0.70,0.88) | 0.59(0.51,0.66) | 0.18(0.14,0.21) |
| Western Europe  | Austria   | 2003–2012 | 5.60(5.43,5.76)   | 0.47(0.42,0.52) | 5.13(4.97,5.28)   | 0.89(0.82,0.96) | 0.61(0.55,0.66) | 0.26(0.23,0.30) |
| Western Europe  | Austria   | 2003–2007 | 6.16(5.91,6.41)   | 0.44(0.38,0.51) | 5.71(5.48,5.95)   | 0.84(0.75,0.94) | 0.60(0.51,0.68) | 0.23(0.18,0.28) |
| Western Europe  | Austria   | 2008–2012 | 5.06(4.84,5.28)   | 0.49(0.42,0.56) | 4.57(4.36,4.78)   | 0.93(0.83,1.02) | 0.61(0.53,0.69) | 0.29(0.24,0.35) |
| Western Europe  | Belgium   | 2003–2012 | 4.01(3.88,4.15)   | 0.59(0.54,0.64) | 3.42(3.30,3.55)   | 2.03(1.93,2.12) | 1.45(1.37,1.54) | 0.50(0.46,0.55) |
| Western Europe  | Belgium   | 2003–2007 | 3.91(3.71,4.11)   | 0.53(0.46,0.61) | 3.38(3.19,3.57)   | 2.06(1.91,2.21) | 1.42(1.30,1.55) | 0.54(0.47,0.62) |
| Western Europe  | Belgium   | 2008–2012 | 4.09(3.91,4.27)   | 0.64(0.56,0.71) | 3.45(3.28,3.62)   | 2.00(1.88,2.13) | 1.48(1.37,1.59) | 0.47(0.42,0.53) |

|                       |                 |           |                    |                 |                    |                 |                 |                 |
|-----------------------|-----------------|-----------|--------------------|-----------------|--------------------|-----------------|-----------------|-----------------|
| Western Europe        | France          | 2003–2012 | 3.29(3.16,3.42)    | 0.42(0.38,0.47) | 2.87(2.75,2.99)    | 1.32(1.24,1.41) | 1.05(0.98,1.13) | 0.24(0.21,0.28) |
| Western Europe        | France          | 2003–2007 | 3.28(3.10,3.46)    | 0.33(0.27,0.38) | 2.95(2.78,3.13)    | 1.30(1.18,1.42) | 1.06(0.95,1.17) | 0.22(0.18,0.26) |
| Western Europe        | France          | 2008–2012 | 3.30(3.12,3.48)    | 0.51(0.44,0.58) | 2.79(2.62,2.95)    | 1.34(1.23,1.46) | 1.05(0.95,1.15) | 0.27(0.22,0.31) |
| Western Europe        | Germany         | 2003–2012 | 5.98(5.83,6.13)    | 0.82(0.77,0.87) | 5.16(5.02,5.29)    | 1.57(1.49,1.65) | 1.13(1.06,1.20) | 0.39(0.35,0.43) |
| Western Europe        | Germany         | 2003–2007 | 6.41(6.19,6.63)    | 0.78(0.71,0.86) | 5.63(5.43,5.84)    | 1.55(1.44,1.67) | 1.22(1.11,1.32) | 0.30(0.25,0.34) |
| Western Europe        | Germany         | 2008–2012 | 5.60(5.40,5.80)    | 0.86(0.78,0.94) | 4.74(4.56,4.92)    | 1.59(1.48,1.70) | 1.05(0.96,1.14) | 0.47(0.42,0.53) |
| Western Europe        | Switzerland     | 2003–2012 | 3.75(3.54,3.95)    | 0.61(0.53,0.69) | 3.13(2.95,3.32)    | 1.64(1.51,1.77) | 1.24(1.12,1.36) | 0.37(0.31,0.42) |
| Western Europe        | Switzerland     | 2003–2007 | 3.81(3.52,4.10)    | 0.62(0.50,0.74) | 3.19(2.92,3.45)    | 1.61(1.42,1.80) | 1.23(1.06,1.41) | 0.36(0.28,0.44) |
| Western Europe        | Switzerland     | 2008–2012 | 3.69(3.41,3.98)    | 0.60(0.49,0.72) | 3.09(2.83,3.35)    | 1.67(1.49,1.85) | 1.24(1.08,1.40) | 0.37(0.29,0.45) |
| Western Europe        | The Netherlands | 2003–2012 | 4.07(3.97,4.18)    | 0.73(0.69,0.78) | 3.34(3.25,3.43)    | 2.77(2.68,2.85) | 1.49(1.42,1.55) | 1.18(1.12,1.23) |
| Western Europe        | The Netherlands | 2003–2007 | 4.13(3.98,4.28)    | 0.74(0.67,0.80) | 3.40(3.26,3.53)    | 2.58(2.46,2.70) | 1.47(1.37,1.56) | 1.02(0.95,1.09) |
| Western Europe        | The Netherlands | 2008–2012 | 4.02(3.87,4.16)    | 0.73(0.67,0.79) | 3.29(3.16,3.42)    | 2.93(2.81,3.05) | 1.50(1.42,1.59) | 1.32(1.24,1.40) |
| Australia/New Zealand | Australia       | 2003–2012 | 3.32(3.24,3.41)    | 0.67(0.63,0.71) | 2.65(2.58,2.73)    | 1.71(1.65,1.77) | 1.14(1.10,1.19) | 0.51(0.48,0.55) |
| Australia/New Zealand | Australia       | 2003–2007 | 3.42(3.29,3.55)    | 0.62(0.57,0.68) | 2.80(2.69,2.92)    | 1.75(1.66,1.84) | 1.18(1.11,1.26) | 0.51(0.46,0.56) |
| Australia/New Zealand | Australia       | 2008–2012 | 3.24(3.12,3.36)    | 0.71(0.66,0.77) | 2.52(2.42,2.63)    | 1.68(1.59,1.76) | 1.11(1.04,1.18) | 0.51(0.47,0.56) |
| Australia/New Zealand | New Zealand     | 2003–2012 | 3.75(3.54,3.97)    | 0.63(0.55,0.72) | 3.12(2.92,3.31)    | 2.01(1.86,2.15) | 1.27(1.16,1.39) | 0.61(0.53,0.69) |
| Australia/New Zealand | New Zealand     | 2003–2007 | 4.00(3.68,4.32)    | 0.57(0.45,0.69) | 3.43(3.13,3.73)    | 2.03(1.82,2.24) | 1.29(1.12,1.46) | 0.60(0.49,0.72) |
| Australia/New Zealand | New Zealand     | 2008–2012 | 3.52(3.23,3.81)    | 0.69(0.56,0.81) | 2.84(2.58,3.10)    | 1.99(1.79,2.19) | 1.26(1.10,1.42) | 0.61(0.50,0.73) |
| South America         | Argentina       | 2003–2012 | 5.01(4.58,5.44)    | 0.24(0.15,0.34) | 4.77(4.35,5.18)    | 2.08(1.88,2.29) | 1.66(1.48,1.85) | 0.41(0.32,0.49) |
| South America         | Argentina       | 2003–2007 | 5.06(4.44,5.68)    | 0.15(0.04,0.25) | 4.91(4.30,5.52)    | 2.32(1.99,2.64) | 1.82(1.53,2.11) | 0.49(0.34,0.63) |
| South America         | Argentina       | 2008–2012 | 4.97(4.38,5.57)    | 0.33(0.18,0.49) | 4.64(4.07,5.21)    | 1.89(1.62,2.15) | 1.53(1.28,1.77) | 0.34(0.24,0.45) |
| South America         | Brazil          | 2003–2012 | 8.15(7.52,8.77)    | 0.59(0.41,0.76) | 7.56(6.96,8.16)    | 1.74(1.44,2.03) | 1.68(1.39,1.97) | 0.04(0.00,0.08) |
| South America         | Brazil          | 2003–2007 | 10.49(9.38,11.60)  | 0.74(0.44,1.04) | 9.75(8.68,10.81)   | 2.29(1.77,2.81) | 2.29(1.77,2.81) | 0.00(0.00,0.00) |
| South America         | Brazil          | 2008–2012 | 6.95(6.15,7.76)    | 0.50(0.28,0.72) | 6.45(5.67,7.23)    | 1.40(1.04,1.77) | 1.30(0.95,1.66) | 0.06(0.00,0.13) |
| South America         | Chile           | 2003–2012 | 18.73(17.15,20.31) | 1.35(0.92,1.78) | 17.38(15.85,18.90) | 4.86(4.02,5.69) | 3.90(3.17,4.62) | 0.33(0.16,0.51) |
| South America         | Chile           | 2003–2007 | 16.02(14.27,17.76) | 1.06(0.61,1.52) | 14.95(13.27,16.64) | 4.10(3.31,4.89) | 3.02(2.37,3.67) | 0.46(0.22,0.70) |

|               |          |           |                    |                 |                    |                 |                 |                 |
|---------------|----------|-----------|--------------------|-----------------|--------------------|-----------------|-----------------|-----------------|
| South America | Chile    | 2008–2012 | 13.94(12.51,15.37) | 1.11(0.69,1.54) | 12.83(11.46,14.19) | 2.80(2.26,3.33) | 2.53(2.02,3.03) | 0.15(0.02,0.27) |
| South America | Colombia | 2003–2012 | 11.69(11.18,12.19) | 0.61(0.50,0.73) | 11.08(10.59,11.56) | 1.22(1.07,1.37) | 0.92(0.80,1.05) | 0.25(0.19,0.32) |
| South America | Colombia | 2003–2007 | 12.84(12.06,13.62) | 0.69(0.51,0.87) | 12.14(11.38,12.90) | 1.46(1.22,1.70) | 1.12(0.91,1.32) | 0.28(0.17,0.38) |
| South America | Colombia | 2008–2012 | 10.76(10.11,11.41) | 0.54(0.40,0.69) | 10.22(9.58,10.85)  | 1.02(0.84,1.20) | 0.76(0.61,0.92) | 0.23(0.15,0.32) |
| South America | Ecuador  | 2003–2012 | 17.63(16.74,18.53) | 0.60(0.43,0.77) | 17.03(16.16,17.91) | 0.80(0.59,1.02) | 0.53(0.36,0.70) | 0.17(0.07,0.27) |
| South America | Ecuador  | 2003–2007 | 16.27(15.13,17.41) | 0.36(0.18,0.54) | 15.91(14.78,17.03) | 0.70(0.41,0.99) | 0.42(0.19,0.65) | 0.26(0.09,0.43) |
| South America | Ecuador  | 2008–2012 | 14.87(13.85,15.89) | 0.64(0.43,0.85) | 14.23(13.24,15.23) | 0.79(0.52,1.06) | 0.51(0.30,0.72) | 0.11(0.00,0.22) |

Note: ESCC, esophageal squamous cell carcinoma; EAC, esophageal adenocarcinoma; GCC, gastric cardia cancer; GNCC, gastric non-cardia cancer

\*Using Segi's World Standard Population as reference

**Supplementary Figure 1. Trends of age-specific incidence rates of intestinal type and diffuse type of gastric cardia cancer and gastric non-cardia cancer in China and US (2003-2012)**

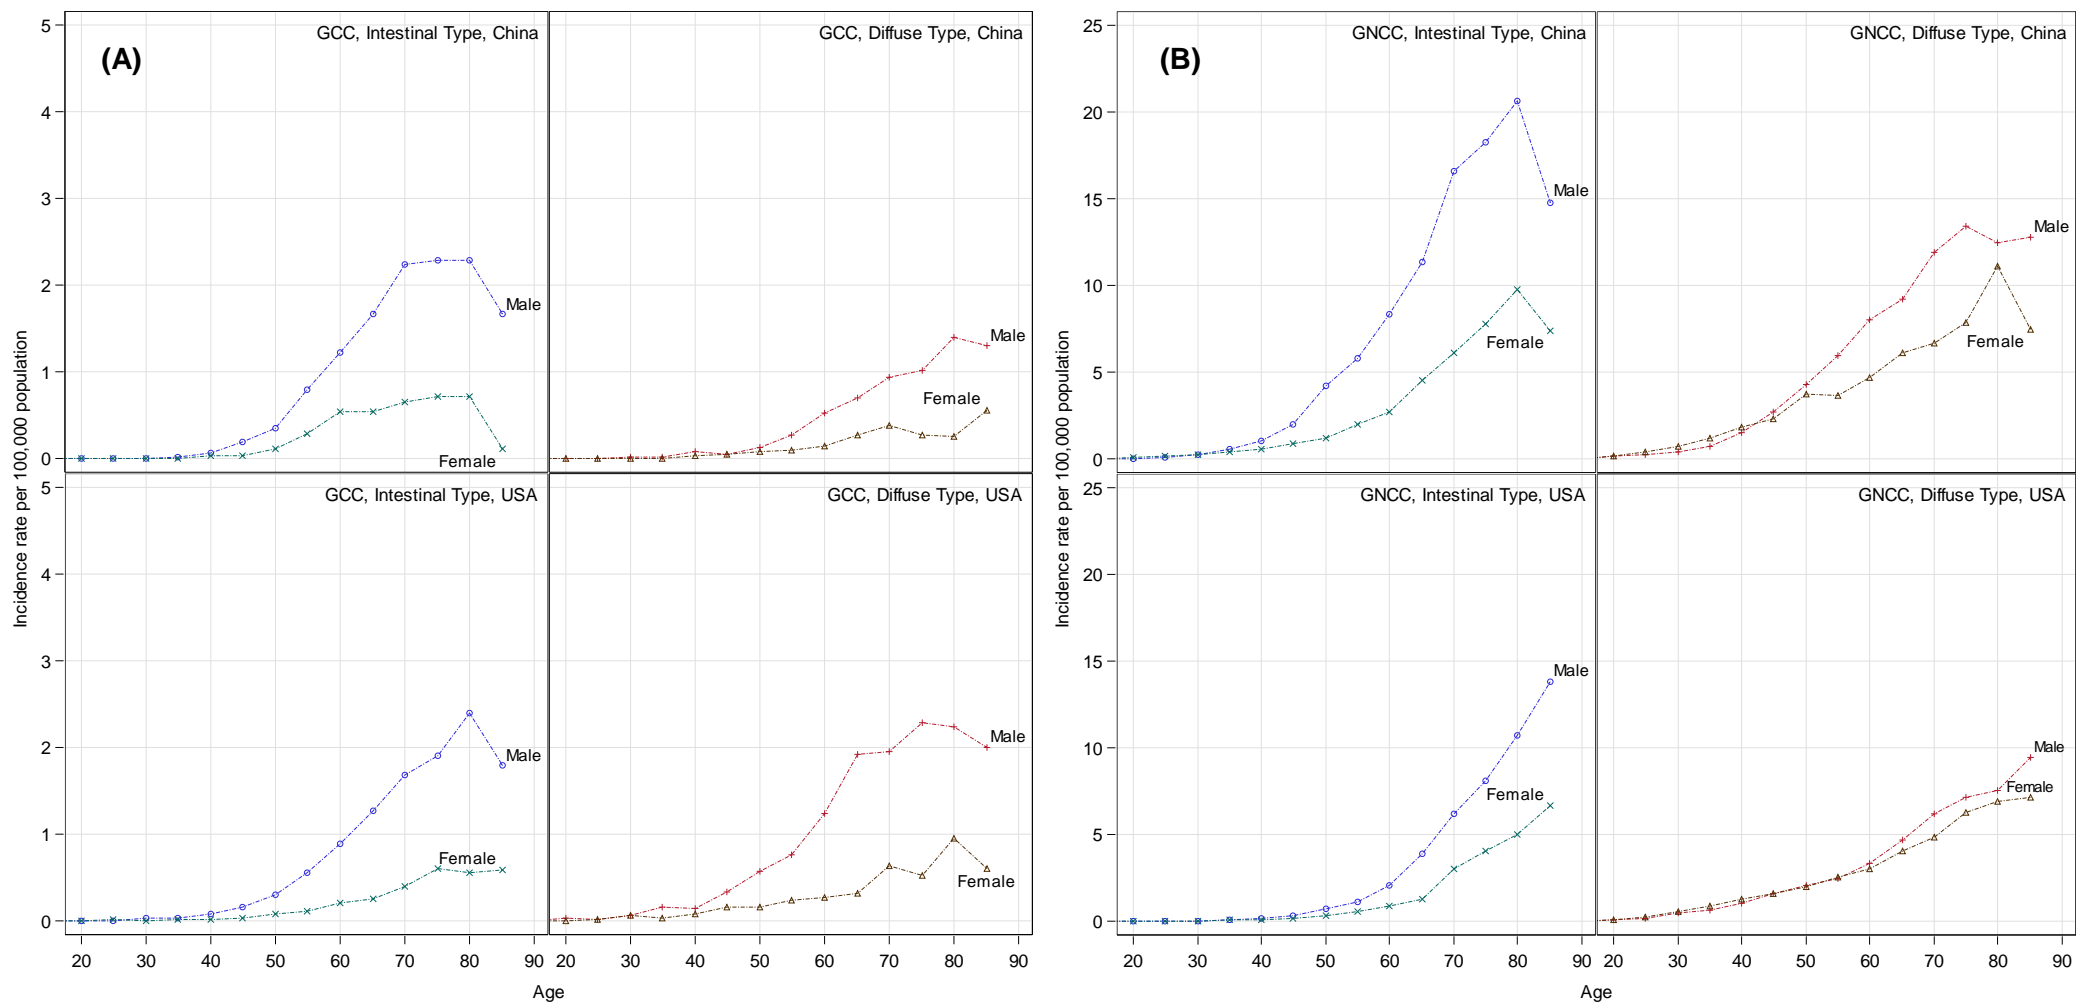

Note: GCC, gastric cardia cancer; GNCC, gastric non-cardia cancer;  
 Data source: 18 registries from Surveillance, Epidemiology, and End Results (SEER) in US and 22 registries from Chinese National Central Cancer Registry reporting 10 consecutive years of data on Laurén classification of gastric cancer from 2003 to 2012.
